# Supplementary material for: Highly Divergent Clostridium difficile Strains Isolated from the Environment
Source: PubMed Central journal article supplement (PMC5120845; doi:10.1371/journal.pone.0167101), 2016-11-23
Supplement: pone.0167101.s003.pdf [file pone.0167101.s003.pdf]

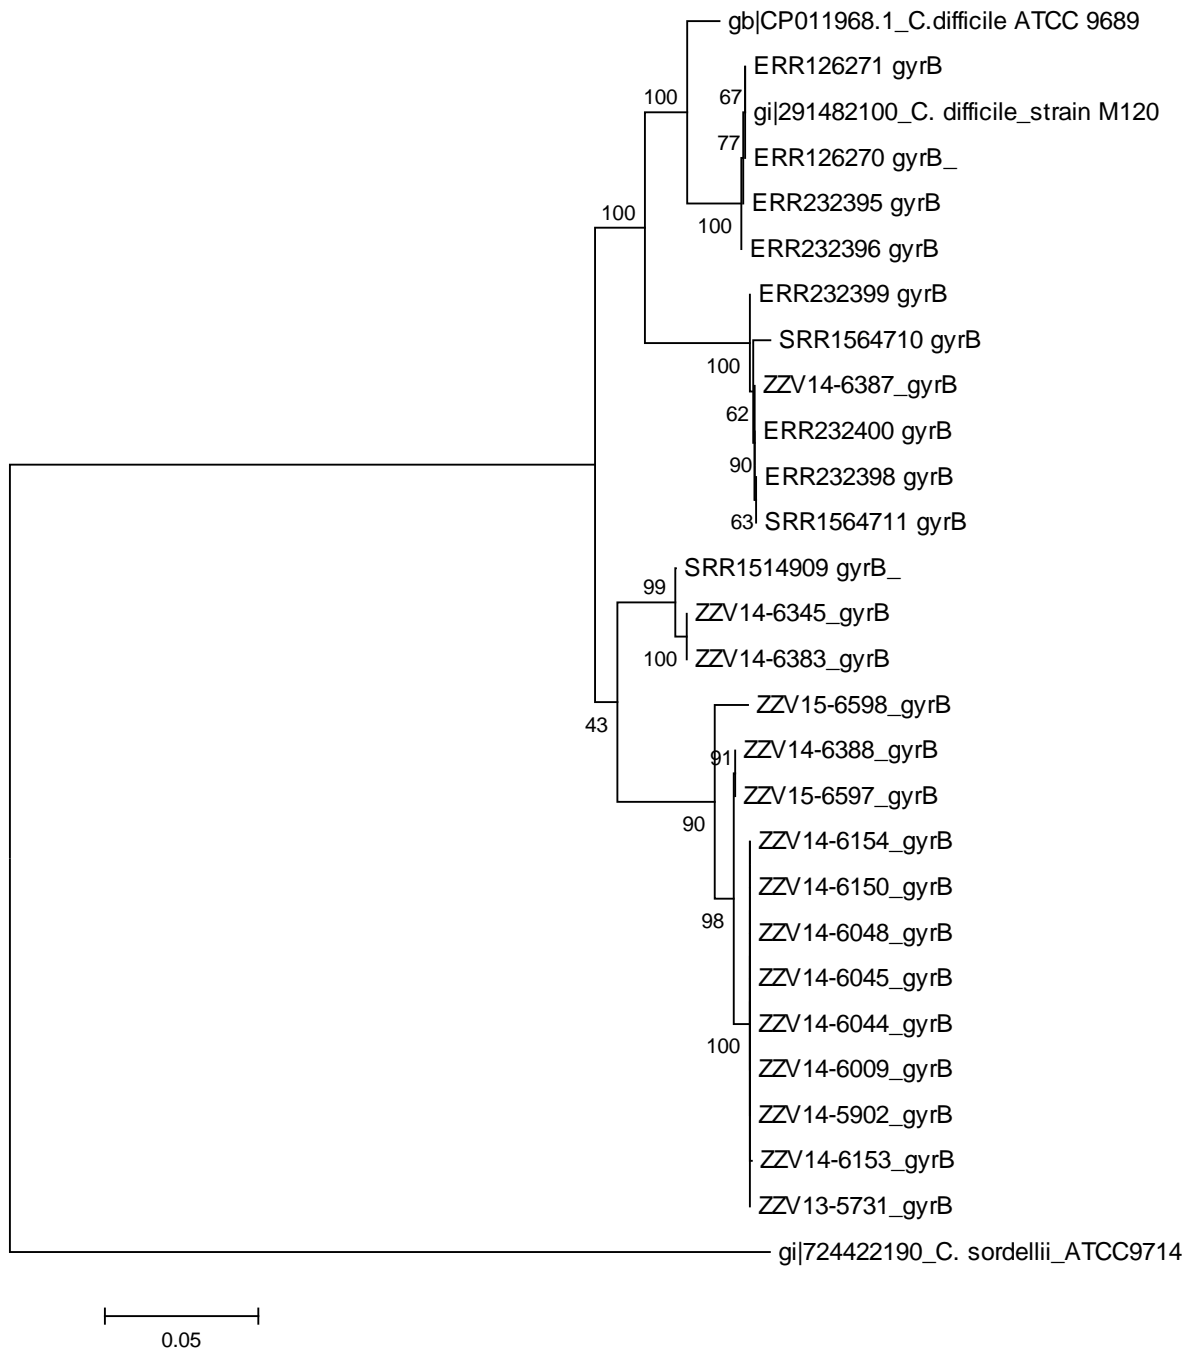

**Figure S3. Phylogenetic relationship of *C. difficile* strains based on *gyrB* gene sequences.** The maximum likelihood phylogenetic tree was constructed in MEGA 6.
