# Supplementary material for: Highly Divergent Clostridium difficile Strains Isolated from the Environment
Source: PubMed Central journal article supplement (PMC5120845; doi:10.1371/journal.pone.0167101), 2016-11-23
Supplement: pone.0167101.s004.pdf [file pone.0167101.s004.pdf]

**Table S1. 16S rDNA sequence similarities of the non-toxigenic environmental *C. difficile* isolates with type strain of *C. difficile* and other closely related bacteria.**

| Isolate    | Clade | 16S rDNA Sequence length (bp) | <i>Clostridium difficile</i> , ATCC 9689 <sup>1</sup> | <i>Eubacterium tenue</i> , ATCC 25553 <sup>2</sup> | <i>Clostridium sordellii</i> , ATCC 9714 <sup>3</sup> | <i>Clostridium ghonii</i> , JCM 1400 <sup>4</sup> | <i>Clostridium manganotii</i> , DSM1289 <sup>5</sup> | <i>Peptostreptococcus anaerobius</i> , NCTC 11460 <sup>6</sup> | <i>Clostridium hiranonis</i> , TO-931 <sup>7</sup> |
|------------|-------|-------------------------------|-------------------------------------------------------|----------------------------------------------------|-------------------------------------------------------|---------------------------------------------------|------------------------------------------------------|----------------------------------------------------------------|----------------------------------------------------|
| ZZV14-6387 | C-I   | 1355                          | 99.9                                                  | 95.9                                               | 96.4                                                  | 95.9                                              | 95.1                                                 | 92.1                                                           | 94.5                                               |
| ZZV14-6345 | C-II  | 1344                          | 99.7                                                  | 96.1                                               | 96.4                                                  | 95.9                                              | 95.3                                                 | 92.1                                                           | 94.5                                               |
| ZZV14-6383 | C-II  | 1360                          | 99.6                                                  | 96.1                                               | 96.4                                                  | 95.9                                              | 95.3                                                 | 92.1                                                           | 94.5                                               |
| ZZV14-5902 | C-III | 1353                          | 99.7                                                  | 95.9                                               | 96.3                                                  | 95.8                                              | 95.2                                                 | 91.9                                                           | 94.4                                               |
| ZZV15-6597 | C-III | 1356                          | 99.8                                                  | 95.9                                               | 96.3                                                  | 95.8                                              | 95.2                                                 | 91.9                                                           | 94.4                                               |
| ZZV15-6598 | C-III | 1356                          | 99.8                                                  | 95.9                                               | 96.3                                                  | 95.8                                              | 95.2                                                 | 92.0                                                           | 94.4                                               |
| ZZV14-6009 | C-III | 1364                          | 99.9                                                  | 95.9                                               | 96.3                                                  | 95.8                                              | 95.2                                                 | 91.9                                                           | 94.4                                               |
| ZZV14-6044 | C-III | 1355                          | 99.9                                                  | 95.9                                               | 96.3                                                  | 95.8                                              | 95.2                                                 | 91.9                                                           | 94.4                                               |
| ZZV14-6153 | C-III | 1338                          | 99.9                                                  | 95.9                                               | 96.3                                                  | 95.8                                              | 95.2                                                 | 91.9                                                           | 94.4                                               |
| ZZV14-6154 | C-III | 1352                          | 99.9                                                  | 95.9                                               | 96.3                                                  | 95.8                                              | 95.2                                                 | 91.9                                                           | 94.4                                               |
| ZZV13-5731 | C-III | 1346                          | 99.8                                                  | 95.9                                               | 96.3                                                  | 95.8                                              | 95.2                                                 | 91.9                                                           | 94.4                                               |
| ZZV14-6045 | C-III | 1348                          | 99.9                                                  | 95.9                                               | 96.3                                                  | 95.8                                              | 95.2                                                 | 91.9                                                           | 94.4                                               |
| ZZV14-6048 | C-III | 1349                          | 99.9                                                  | 95.9                                               | 96.3                                                  | 95.8                                              | 95.2                                                 | 91.9                                                           | 94.4                                               |
| ZZV14-6150 | C-III | 1345                          | 99.9                                                  | 95.9                                               | 96.3                                                  | 95.8                                              | 95.2                                                 | 91.9                                                           | 94.4                                               |
| ZZV14-6388 | C-III | 1345                          | 99.9                                                  | 95.9                                               | 96.3                                                  | 95.8                                              | 95.2                                                 | 91.9                                                           | 94.4                                               |

<sup>1</sup>Accession number: CP011968.1

<sup>2</sup>Accession number: M59118.1

<sup>3</sup>Accession number: AB075771.1

<sup>4</sup>Accession number: AB542933.1

<sup>5</sup>Accession number: FR733662.1

<sup>6</sup>Accession number: AY326462.1

<sup>7</sup>Accession number: AB023970.1
