# Supplementary material for: Highly Divergent Clostridium difficile Strains Isolated from the Environment
Source: PubMed Central journal article supplement (PMC5120845; doi:10.1371/journal.pone.0167101), 2016-11-23
Supplement: pone.0167101.s005.pdf [file pone.0167101.s005.pdf]

**Table S2. Comparisons of *rpoB* gene similarities in strains investigated.**

| Strain                     | Clade | <i>rpoB</i> similarity (%) |                   |                        |
|----------------------------|-------|----------------------------|-------------------|------------------------|
|                            |       | ATCC 9689 <sup>3</sup>     | M120 <sup>4</sup> | ATCC 9714 <sup>5</sup> |
| ATCC 9689 (T) <sup>3</sup> | 1     | -                          | 98,5              | 84,9                   |
| ERR126270 <sup>2</sup>     | 5     | 98.5                       | 100.0             | 84.5                   |
| ERR126271 <sup>2</sup>     | 5     | 98.5                       | 100.0             | 84.5                   |
| ERR232395 <sup>2</sup>     | 5     | 98.6                       | 99.9              | 84.5                   |
| ERR232396 <sup>2</sup>     | 5     | 98.5                       | 99.9              | 84.5                   |
| M120 <sup>4</sup>          | 5     | 98.5                       | -                 | 84.5                   |
| ERR232398 <sup>2</sup>     | C-I   | 96.6                       | 96.3              | 84.4                   |
| ERR232399 <sup>2</sup>     | C-I   | 96.6                       | 96.2              | 84.4                   |
| ERR232400 <sup>2</sup>     | C-I   | 96.6                       | 96.3              | 84.3                   |
| ZZV14-6387                 | C-I   | 96.7                       | 96.4              | 84.3                   |
| SRR1564710 <sup>1</sup>    | C-I   | 96.7                       | 96.4              | 84.3                   |
| SRR1564711 <sup>1</sup>    | C-I   | 96.6                       | 96.3              | 84.4                   |
| ZZV14-6345                 | C-II  | 97.5                       | 97.2              | 84.2                   |
| ZZV14-6383                 | C-II  | 97.5                       | 97.2              | 84.2                   |
| SRR1514909 <sup>1</sup>    | C-II  | 97.4                       | 97.2              | 84.3                   |
| ZZV13-5731                 | C-III | 95.8                       | 95.4              | 84.9                   |
| ZZV14-5902                 | C-III | 95.8                       | 95.4              | 84.9                   |
| ZZV14-6009                 | C-III | 95.8                       | 95.4              | 84.9                   |
| ZZV14-6044                 | C-III | 95.8                       | 95.4              | 84.9                   |
| ZZV14-6045                 | C-III | 95.8                       | 95.4              | 84.9                   |
| ZZV14-6048                 | C-III | 95.8                       | 95.5              | 84.9                   |
| ZZV14-6150                 | C-III | 95.8                       | 95.4              | 84.9                   |
| ZZV14-6153                 | C-III | 95.7                       | 95.3              | 84.7                   |
| ZZV14-6154                 | C-III | 95.7                       | 95.4              | 84.9                   |
| ZZV14-6388                 | C-III | 95.8                       | 95.5              | 84.9                   |
| ZZV15-6597                 | C-III | 95.8                       | 95.5              | 84.9                   |
| ZZV15-6598                 | C-III | 95.8                       | 95.5              | 84.7                   |

<sup>1</sup> Strains described in Monot *et al.* 2015, Sci Rep; <sup>2</sup> strains described in Dingle *et al.*, 2014 Genome Biol Evol.

<sup>3</sup> Accession nr. of *C. difficile* ATCC 9689 (type strain): CP011968.1

<sup>4</sup> Accession nr. of *C. difficile* strain M120: FN665653.1

<sup>5</sup> Accession nr. of *C. sordellii* strain ATCC 9714: LN679998.1
