# Supplementary material for: Highly Divergent Clostridium difficile Strains Isolated from the Environment
Source: PubMed Central journal article supplement (PMC5120845; doi:10.1371/journal.pone.0167101), 2016-11-23
Supplement: pone.0167101.s006.pdf [file pone.0167101.s006.pdf]

**Table S3. Comparisons of *gyrB* gene similarities in strains investigated.**

|                           | Clade | <i>gyrB</i> similarity (%) |                   |                        |
|---------------------------|-------|----------------------------|-------------------|------------------------|
|                           |       | ATCC 9689(T) <sup>3</sup>  | M120 <sup>4</sup> | ATCC 9714 <sup>5</sup> |
| ATCC 9669(T) <sup>3</sup> | 1     | -                          | 97.3              | 78.3                   |
| ERR126270 <sup>2</sup>    | 5     | 97.3                       | 100.0             | 78.2                   |
| ERR126271 <sup>2</sup>    | 5     | 97.3                       | 100.0             | 78.2                   |
| ERR232395 <sup>2</sup>    | 5     | 97.4                       | 99.9              | 78.2                   |
| ERR232396 <sup>2</sup>    | 5     | 97.4                       | 99.9              | 78.3                   |
| M120 <sup>4</sup>         | 5     | 97.3                       | -                 | 78.2                   |
| ERR232398 <sup>2</sup>    | C-I   | 94.9                       | 94.3              | 78.2                   |
| ERR232399 <sup>2</sup>    | C-I   | 95.1                       | 94.5              | 78.2                   |
| ERR232400 <sup>2</sup>    | C-I   | 94.9                       | 94.3              | 78.2                   |
| ZZV14-6387                | C-I   | 94.9                       | 94.3              | 78.2                   |
| SRR1564710 <sup>1</sup>   | C-I   | 94.7                       | 94.2              | 78.3                   |
| SRR1564711 <sup>1</sup>   | C-I   | 94.9                       | 94.3              | 78.2                   |
| ZZV14-6345                | C-II  | 94.9                       | 93.9              | 79.0                   |
| ZZV14-6383                | C-II  | 94.9                       | 93.9              | 79.0                   |
| SRR1514909 <sup>1</sup>   | C-II  | 95.0                       | 93.9              | 79.2                   |
| ZZV13-5731                | C-III | 93.0                       | 92.6              | 79.6                   |
| ZZV14-5902                | C-III | 93.0                       | 92.6              | 79.6                   |
| ZZV14-6009                | C-III | 93.0                       | 92.6              | 79.6                   |
| ZZV14-6044                | C-III | 93.0                       | 92.6              | 79.6                   |
| ZZV14-6045                | C-III | 93.0                       | 92.6              | 79.6                   |
| ZZV14-6048                | C-III | 93.0                       | 92.6              | 79.6                   |
| ZZV14-6150                | C-III | 93.0                       | 92.6              | 79.6                   |
| ZZV14-6153                | C-III | 93.0                       | 92.5              | 79.6                   |
| ZZV14-6154                | C-III | 93.0                       | 92.6              | 79.6                   |
| ZZV14-6388                | C-III | 93.4                       | 93.0              | 79.7                   |
| ZZV15-6597                | C-III | 93.4                       | 93.0              | 79.7                   |
| ZZV15-6598                | C-III | 93.0                       | 92.5              | 79.4                   |

<sup>1</sup> Strains described in Monot *et al.* 2015, Sci Rep; <sup>2</sup> strains described in Dingle *et al.*, 2014 Genome Biol Evol.

<sup>3</sup> Accession nr. of *C. difficile* ATCC 9689 (type strain): CP011968.1

<sup>4</sup> Accession nr. of *C. difficile* strain M120: FN665653.1

<sup>5</sup> Accession nr. of *C. sordellii* strain ATCC 9714: LN679998.1
